# Supplementary material for: What Happens After Intensive Treatment? Post-Discharge Skill Use and Affect as Predictors of Depression Outcomes
Source: Research Square preprint supplement (doi:10.21203/rs.3.rs-7614725/v1), 2025-09-23
Supplement: Supplementary file 1 [file b57773dd25a4586ac3720cb8.docx]

**Supplementary materials**

**Preregistered Predictive model**

The model with only preregistered predictors (i.e., PA-BT correlation, PA-DBT correlation, and total use of each skill) was similar to the model reported in the main manuscript, however the accuracy was slightly lower, at 60% (95% CI [.47, .724]). Sensitivity was .23 and specificity was .88 (Figure S1). The selected lambda was .13.

**Figure S1**

*Sensitivity and specify of the estimated model*


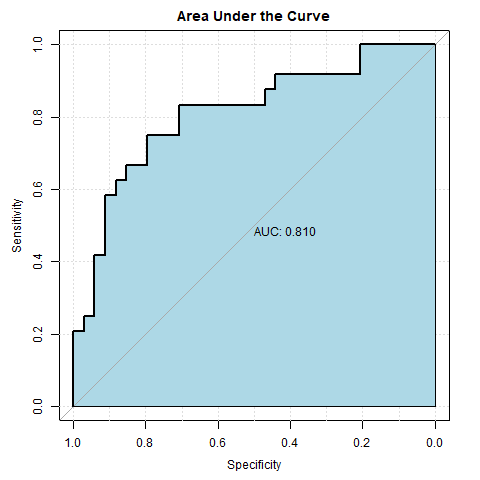


Akin to the model reported in the main manuscript, behavioral activation was a predictor of improvement. PA-CBT correlation was again a predictor of non-improvement. Differing from the model in the manuscript, emotion regulation was a predictor of improvement, total skills use was not a retained predictor (the effect was negligible in the main manuscript). Table S1 reports all retained predictors.

**Table S1**

*Coefficients of the selected model with minimum lambda.*

| Predictor | Log Odds | Odds Ratio |
| --- | --- | --- |
| (Intercept) | -0.27 | 0.76 |
| PABTcor | -0.20 | 0.82 |
| totDBT | 0.02 | 1.02 |
| ba_tot | 0.24 | 1.27 |
| emoreg_tot | 0.10 | 1.10 |

*Note.* PA-DBT correlation, Total BT skills, total skills overall, and total use of: self-assessment, behavioral scheduling, mindfulness, exposure, cognitive restructuring, interpersonal effectiveness/communication, and distress tolerance were not retained in the model.
